# Supplementary material for: Glyoxal tropospheric column retrievals from TROPOMI, multi-satellite intercomparison and ground-based validation
Source: Copernicus journal article supplement (doi:10.5194/amt-2021-158), 2021-06-10
Supplement: Supplementary file 1 [file amt-2021-158-supplement.pdf]

1     **Supplementary figures**

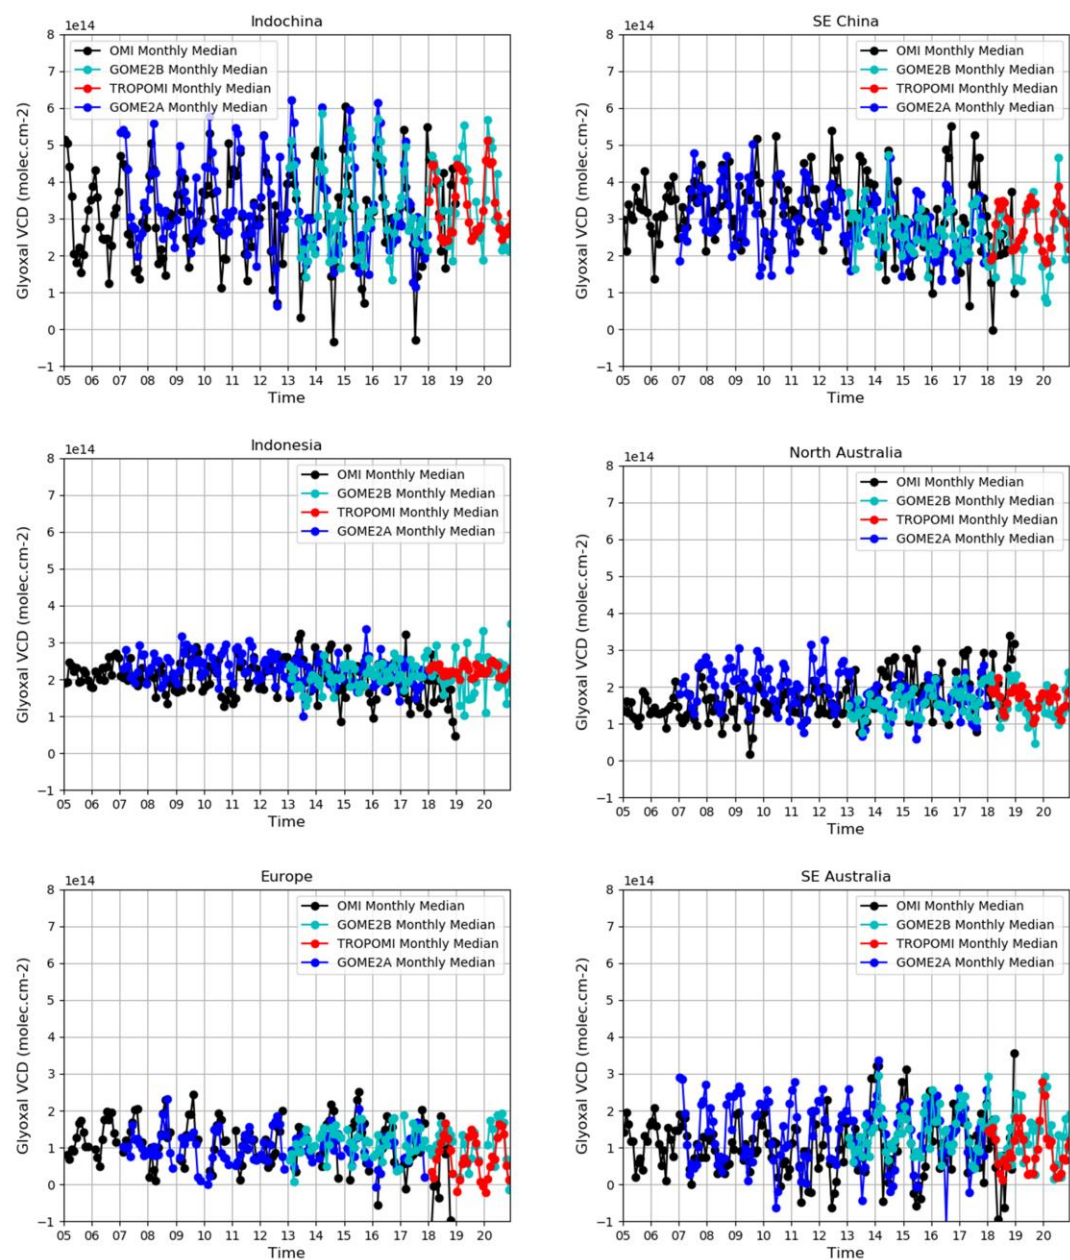

2  
3     **Figure S1: Comparison of the monthly median glyoxal VCD time series from GOME-2A/B, OMI and TROPOMI in a**  
4     **few selected regions worldwide.**

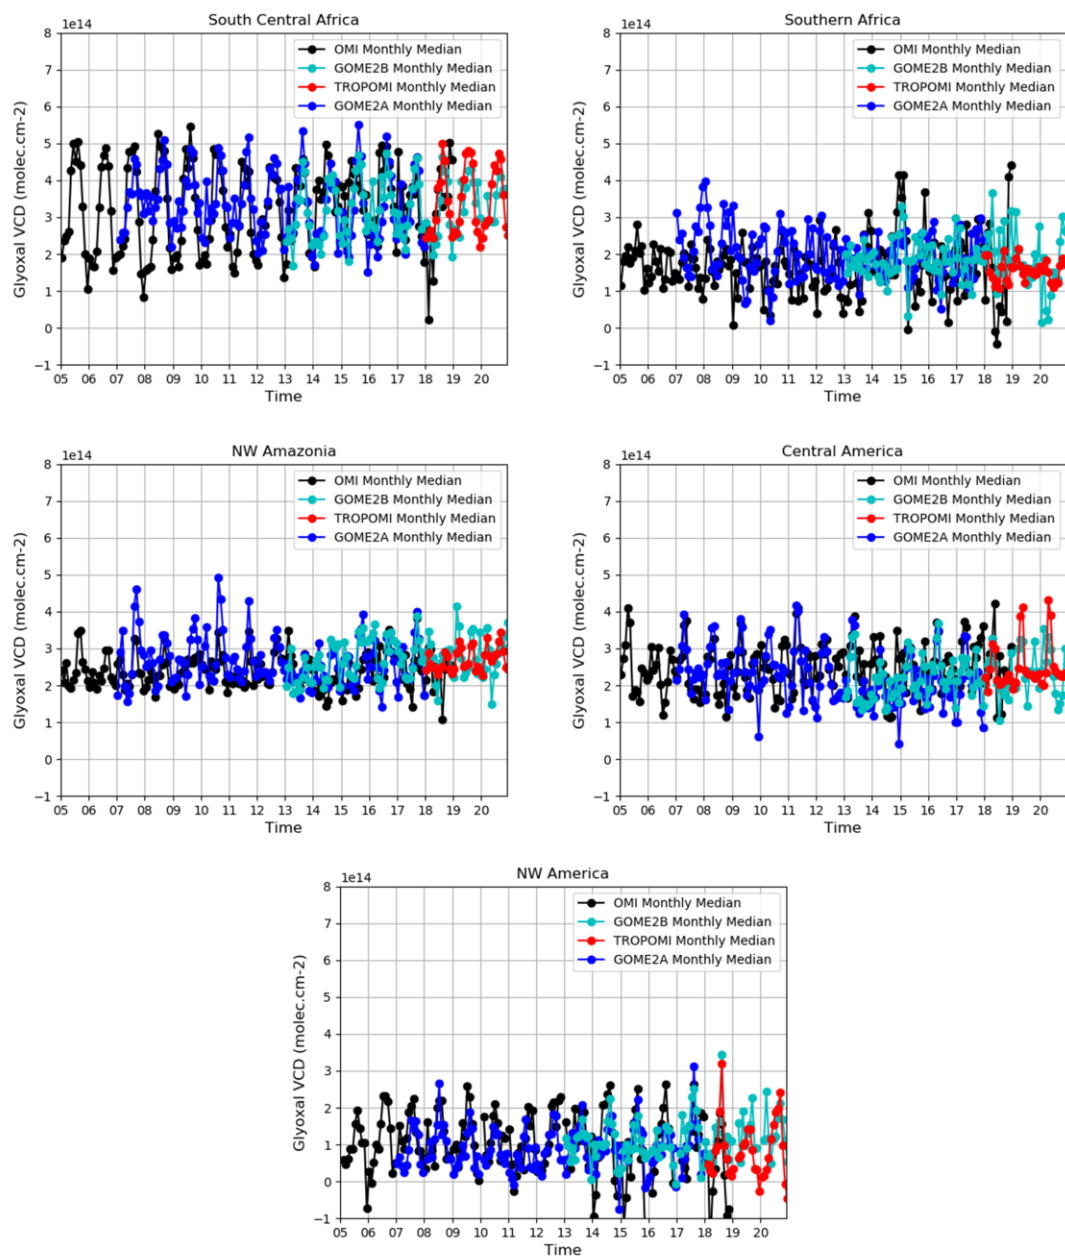

**Figure S2: Comparison of the monthly median glyoxal VCD time series from GOME-2A/B, OMI and TROPOMI in a few selected regions worldwide.**

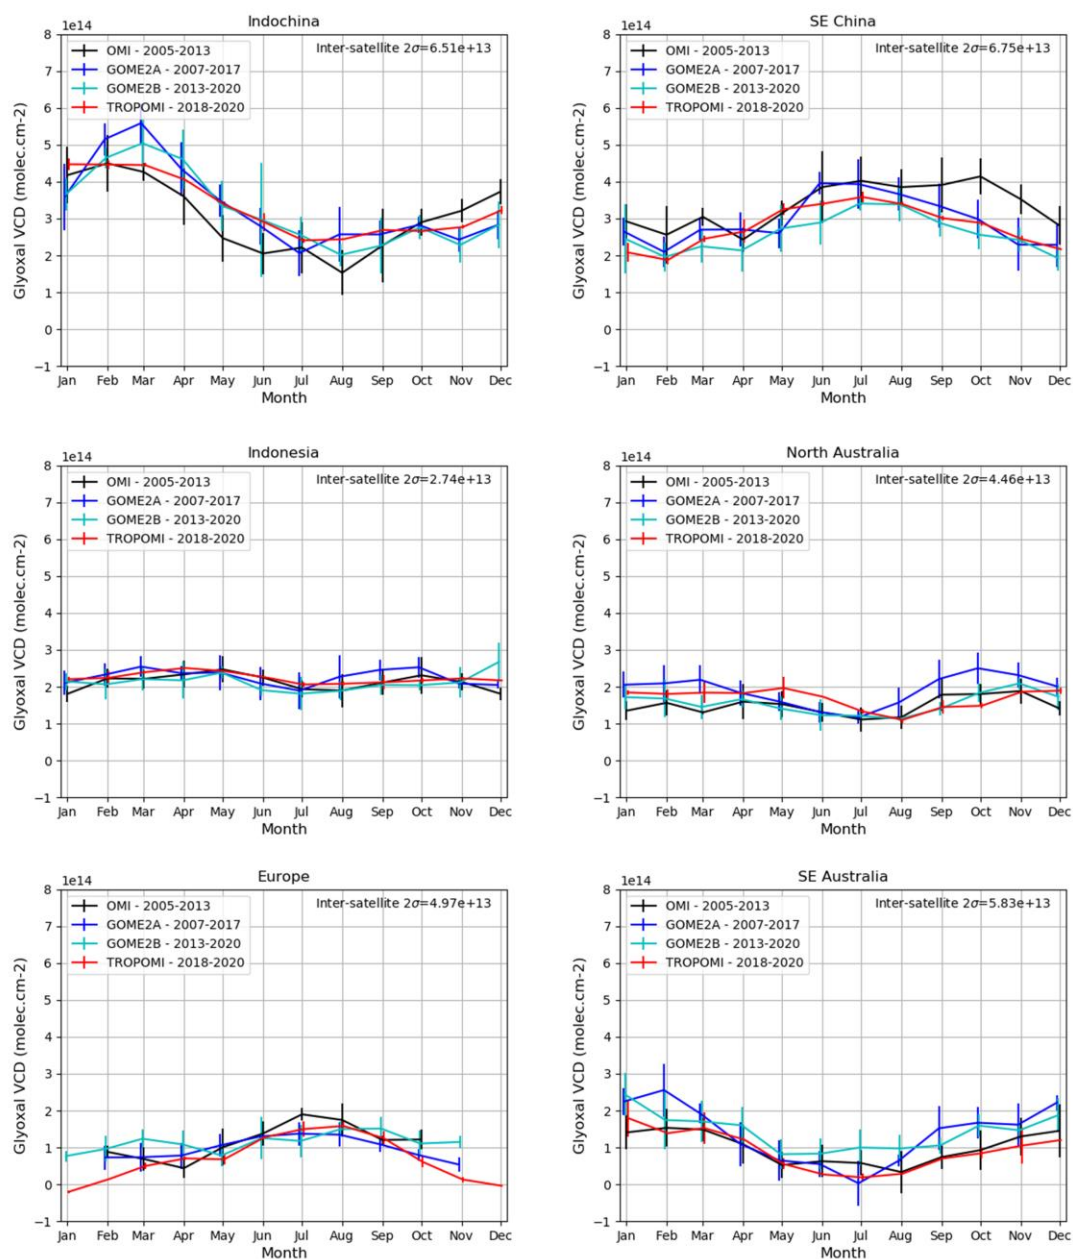

**Figure S3: Comparison of the climatological seasonal variation of the monthly median glyoxal VCDs from GOME-2A/B, OMI and TROPOMI in a few selected regions worldwide. The error bars represent the interannual variability as derived from the full time series.**

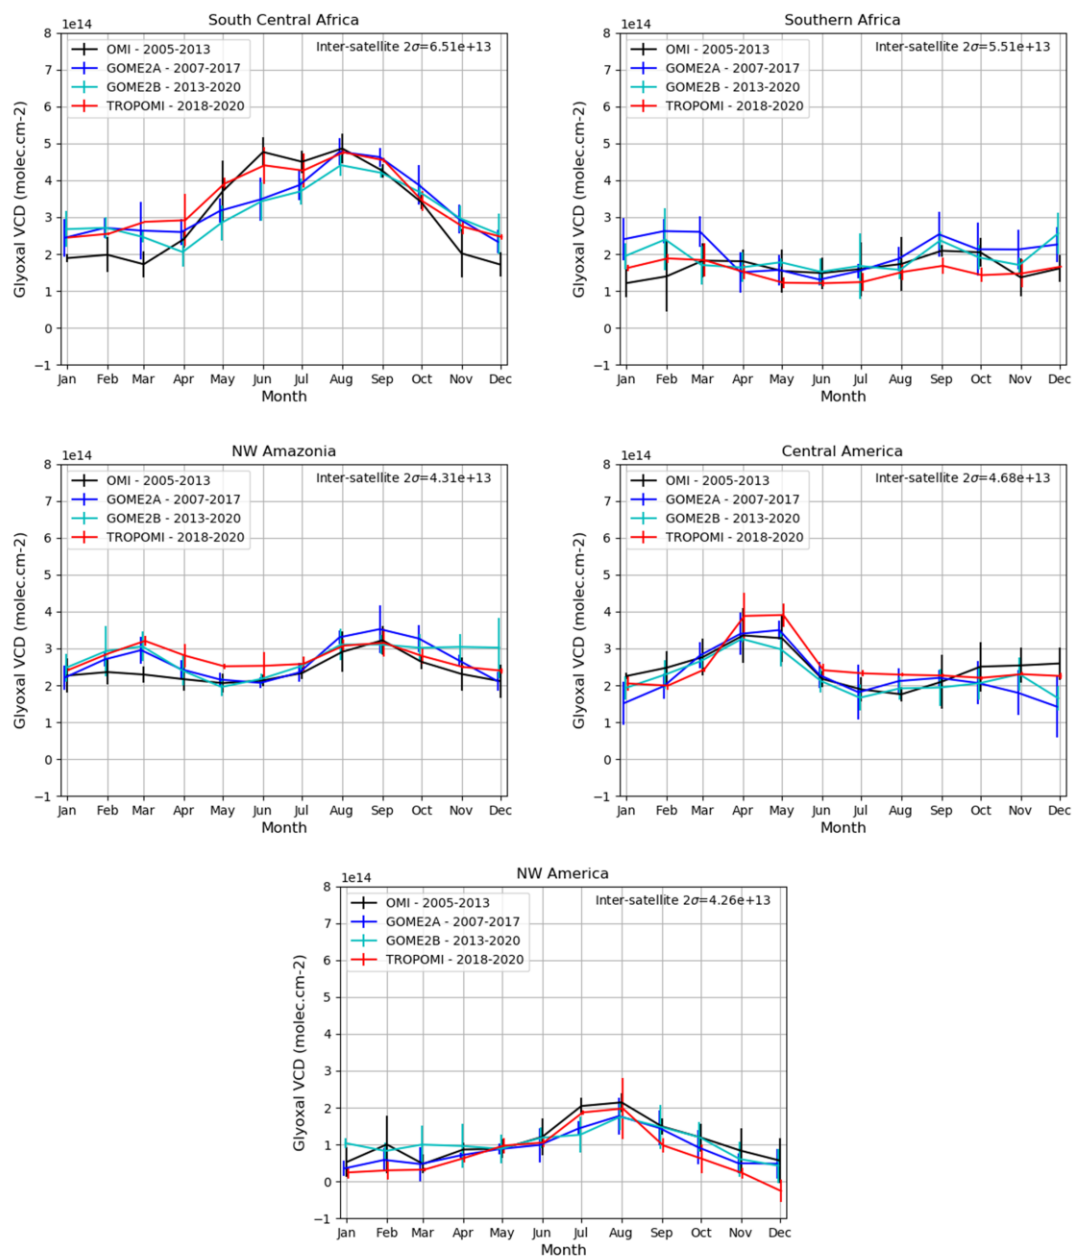

**Figure S4: Comparison of the climatological seasonal variation of the monthly median glyoxal VCDs from GOME-2A/B, OMI and TROPOMI in a few selected regions worldwide. The error bars represent the interannual variability as derived from the full time series.**
